# Supplementary material for: Validity of Ultra-Short-Term HRV Analysis Using PPG—A Preliminary Study
Source: MDPI journal article supplement (doi:10.3390/s22207995), 2022-10-20
Supplement: s1 [file s1]

**Figure S1.** Original Bland-Altman plots for a selection of HRV features extracted from PPG recordings of 5 min 30 s and 1 min 30 s durations and 25 Hz and 200 Hz sampling rates ( $HRV_{F_{PX}}$ ), compared with the HRV features extracted from ECG recordings of 5 min 30 s duration ( $HRV_{E5}$ ). All HRV features were transformed with the log transformation before plotting the Bland-Altman plots. The selection of the features to be visualized was based on the results presented in Table 2 of the paper and on the correlation coefficients between the valid features. Therefore, only features that were valid in ultra-short recordings and that were not correlated (correlation coefficient  $< 0.9$ ) with other features were shown hereafter.

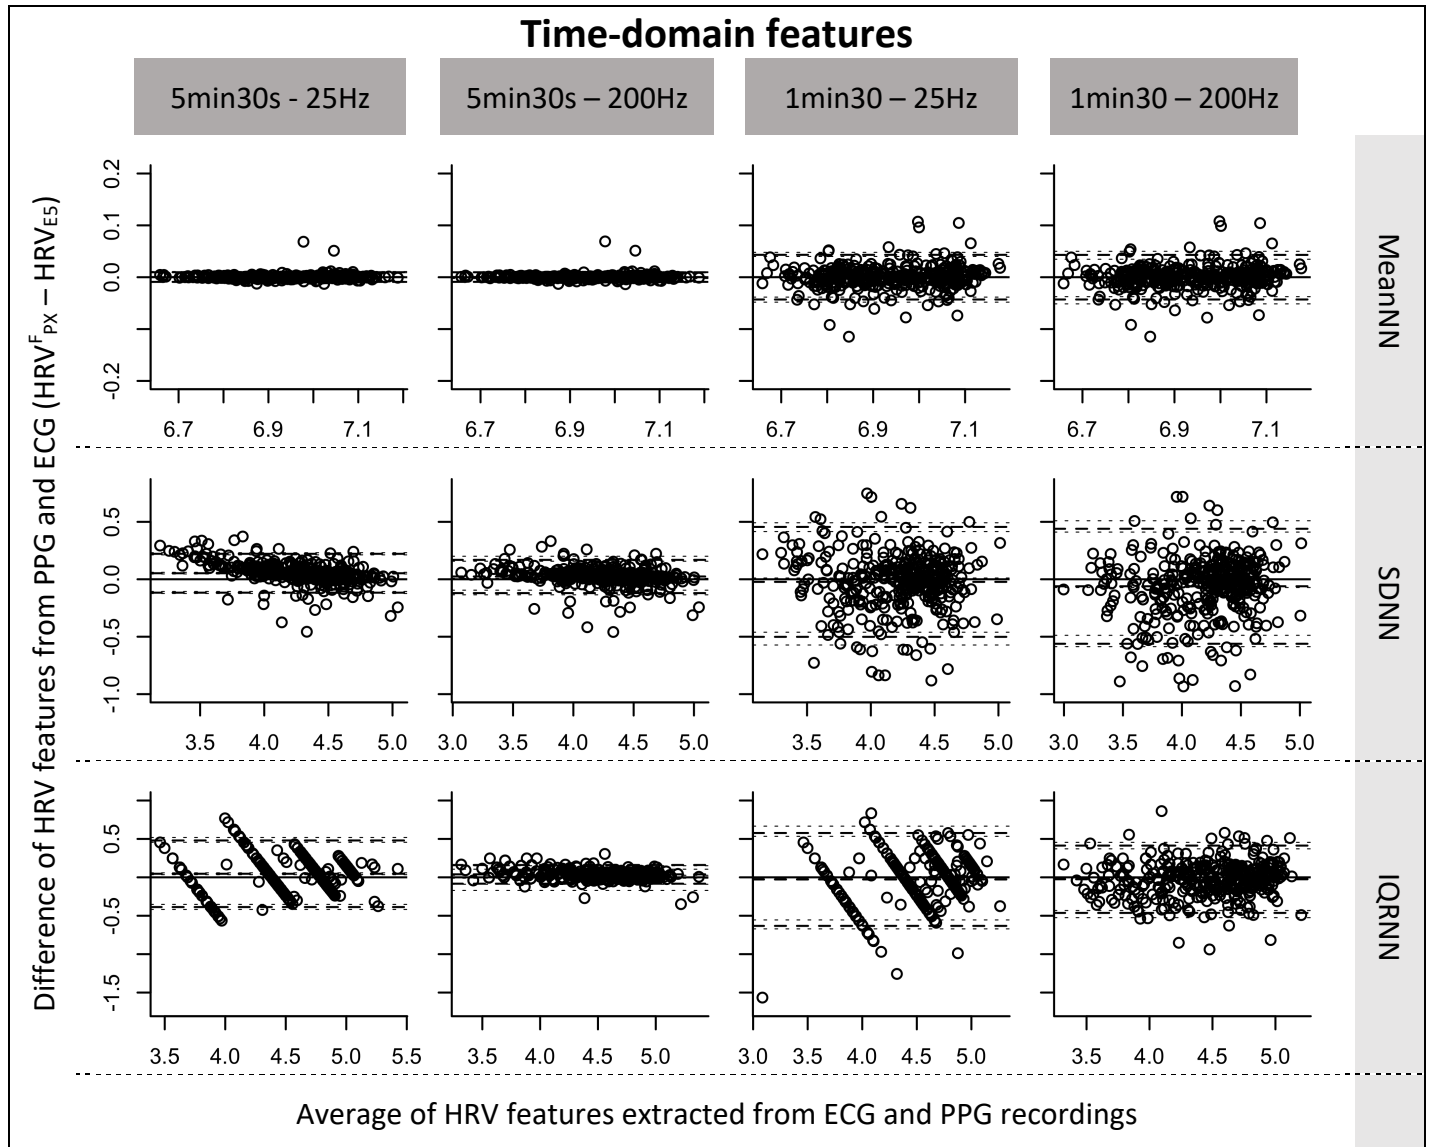

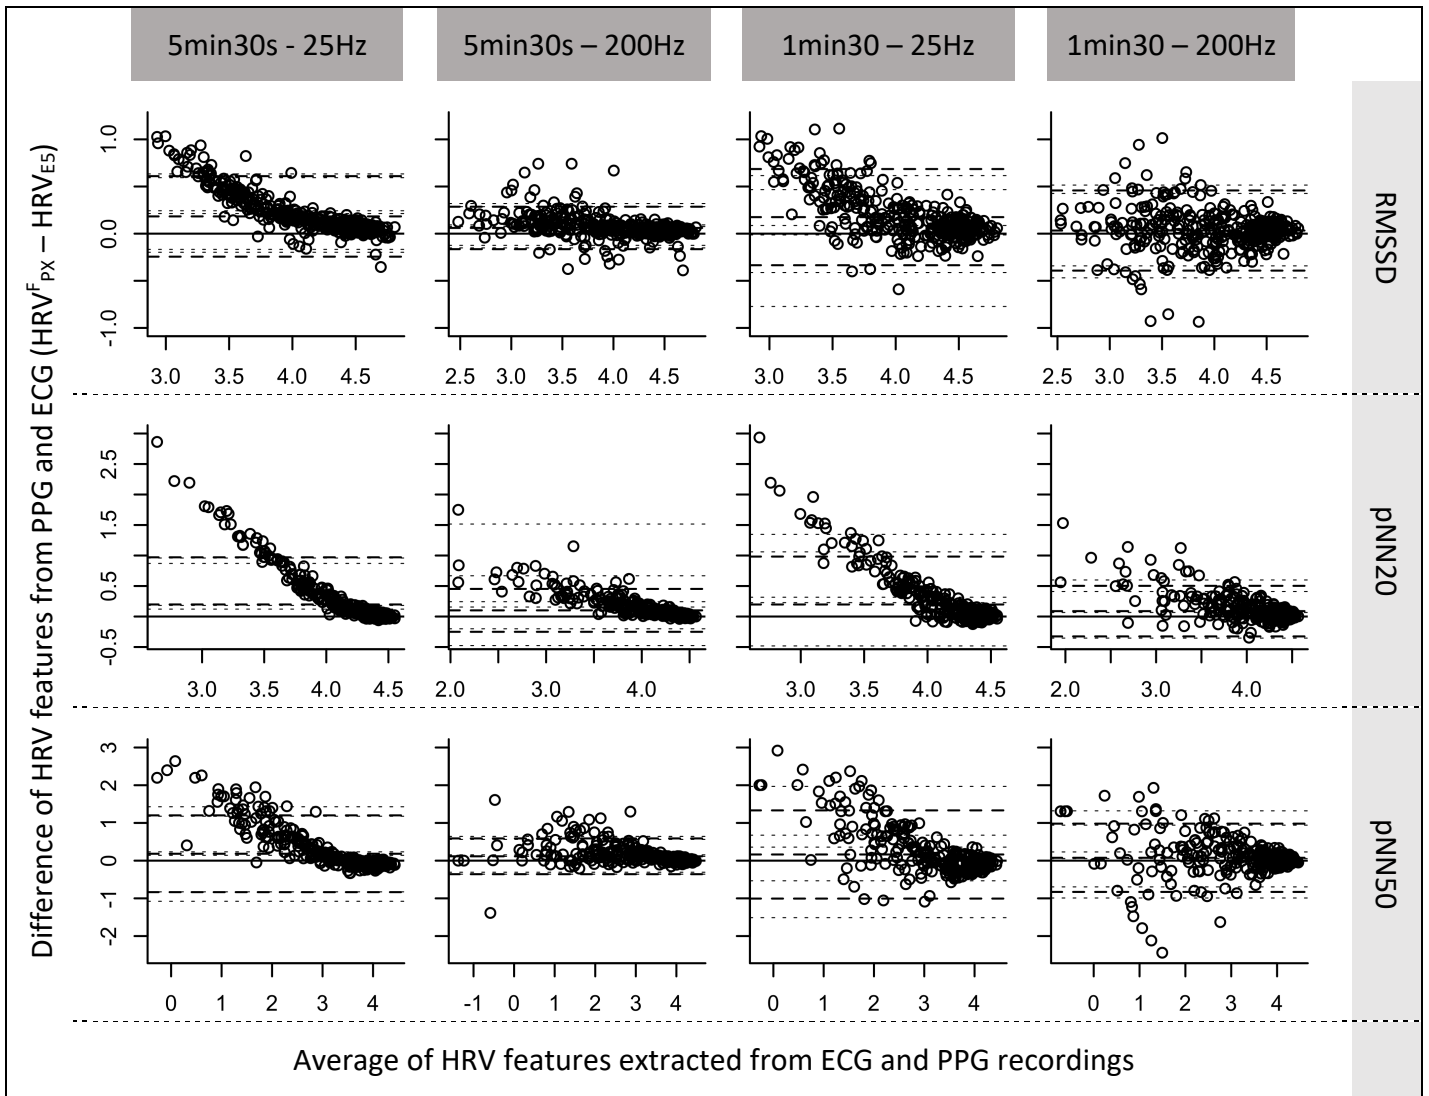

## Frequency-domain features

Difference of HRV features from PPG and ECG ( $HRV_{PX}^F - HRV_{E5}$ )

5min30s - 25Hz

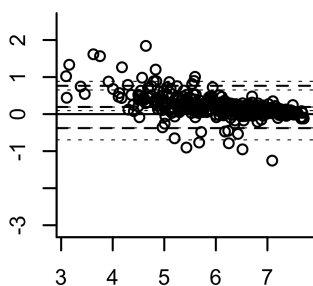

5min30s - 200Hz

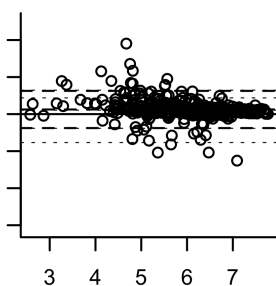

1min30 - 25Hz

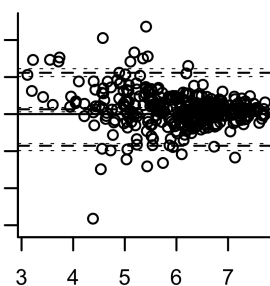

1min30 - 200Hz

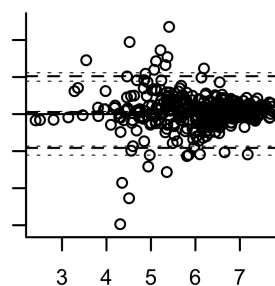

HF [Fr]

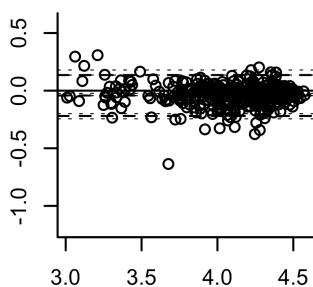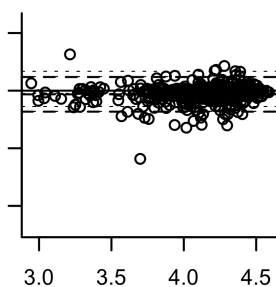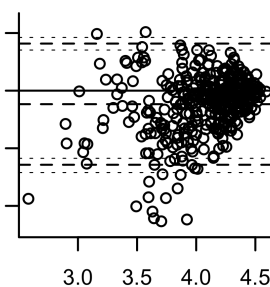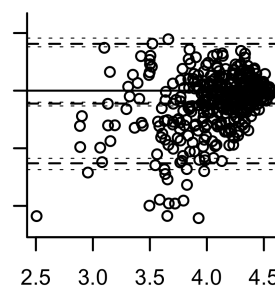

LFnu [Fr]

Average of HRV features extracted from ECG and PPG recordings

## Nonlinear features

Difference of HRV features from PPG and ECG ( $HRV_{PX}^F - HRV_{E5}$ )

5min30s - 25Hz

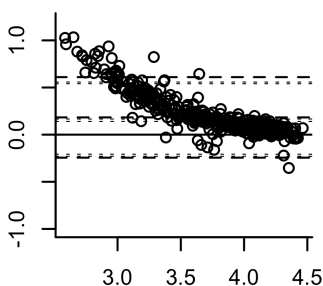

5min30s - 200Hz

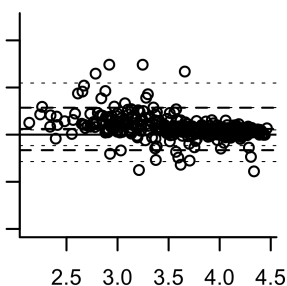

1min30 - 25Hz

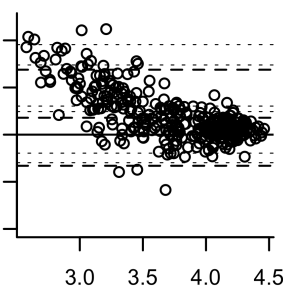

1min30 - 200Hz

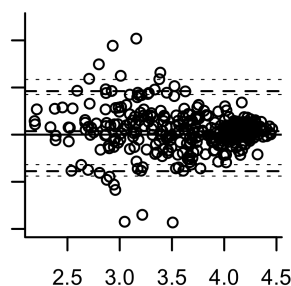

SD1

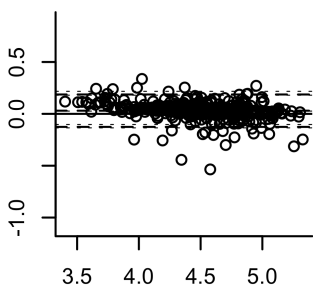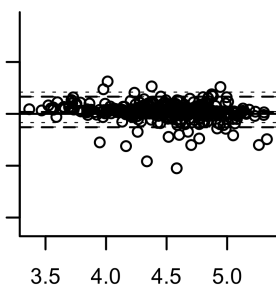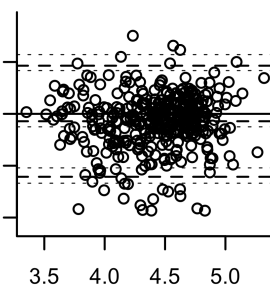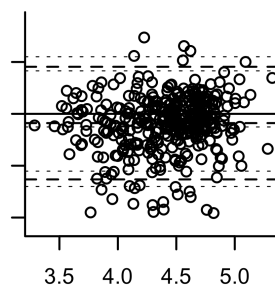

SD2

Average of HRV features extracted from ECG and PPG recordings
