# Supplementary material for: Validity of Ultra-Short-Term HRV Analysis Using PPG—A Preliminary Study
Source: Sensors (Basel). 2022 Oct 20;22(20):7995. doi: 10.3390/s22207995 (PMC9611389; doi:10.3390/s22207995)
Supplement: Supplementary file 1 [file sensors-22-07995-s001.zip › Table S1. Descriptive statistics of HRV features obtained from ECG and PPG recordings.xlsx]

## Sheet: Sheet1
Table S1. Descriptive statistics of HRV features obtained from ECG and PPG recordings. a.u. arbitrary unit
	ECG 5 min 30 s - 256 Hz	PPG 5 min 30 s - 25 Hz	PPG 1 min 30 s - 25 Hz	PPG 5 min 30 s - 200 Hz	PPG 1 min 30 s - 200 Hz
	median [IQR]	median [IQR]	median [IQR]	median [IQR]	median [IQR]
Time-domain features
MeanNN (ms)	1039.58 [941.6; 1144.93]	1042.16 [940.29; 1144.75]	1031.63 [938.09; 1148.05]	1040.64 [940.28; 1145]	1032,06 [937,55; 1148,14]
MedianNN (ms)	1039.07 [941.42; 1144.54]	1040 [930; 1160]	1040 [920; 1160]	1040 [940; 1145]	1035 [935; 1150]
SDNN (ms)	77.12 [57.43; 92.77]	80.28 [62.12; 95.36]	73.51 [52.88; 89.11]	78.92 [60.2; 95.23]	72,01 [50,86; 88,62]
CVNN (a.u.)	0.07 [0.06; 0.09]	0.08 [0.06; 0.09]	0.07 [0.05; 0.08]	0.07 [0.06; 0.09]	0,07 [0,05; 0,08]
IQRNN (ms)	95.7 [66.41; 125]	120 [80; 120]	80 [80; 120]	100 [70; 128.75]	88,75 [60; 117,5]
RMSSD (ms)	70.75 [39.2; 88.8]	76.97 [51.13; 95.13]	71.9 [48.3; 94.06]	73.25 [43.93; 92.39]	66,31 [40,59; 91,02]
SDSD (ms)	70.88 [39.27; 88.95]	77.09 [51.22; 95.28]	72.36 [48.53; 94.63]	73.37 [43.99; 92.55]	66,69 [40,8; 91,62]
CVSD (a.u.)	0.07 [0.04; 0.08]	0.07 [0.05; 0.09]	0.07 [0.05; 0.09]	0.07 [0.04; 0.08]	0,06 [0,04; 0,08]
pNN20 (%)	77.6 [52.38; 84.65]	79.9 [66.76; 85.76]	77.92 [65.06; 84.78]	79.48 [58.82; 85.77]	77,38 [58,33; 85,14]
pNN50 (%)	49.72 [14.78; 64.97]	45.51 [19.1; 58.52]	40.48 [18.56; 57.75]	51.57 [18.18; 64.79]	46,67 [16,48; 64,29]
HTI (a.u.)	15.83 [12.36; 18.86]	4.56 [3.44; 5.68]	4 [2.93; 4.93]	14.22 [10.8; 16.86]	10,38 [8,08; 12,57]
Skewness (a.u.)	0.06 [-0.34; 0.39]	0.03 [-0.29; 0.36]	0.08 [-0.19; 0.32]	0.03 [-0.3; 0.39]	0,08 [-0,17; 0,37]
Kurtosis (a.u.)	0.51 [-0.15; 1.98]	0.54 [-0.1; 1.83]	-0.02 [-0.43; 0.73]	0.57 [-0.13; 1.95]	-0,04 [-0,47; 0,75]
Frequency-domain features
LF (ms2)	998.37 [554.18; 1623.78]	1041.35 [594.59; 1700.63]	827.58 [402.52; 1366.61]	1021.93 [581.7; 1721.21]	809,79 [388,44; 1396,51]
LF [FR] (ms2)	970.92 [554.13; 1595.18]	1021.13 [587.76; 1696.17]	812.82 [401.14; 1363.91]	1008.69 [574.83; 1688.99]	790,53 [379,9; 1373,29]
HF (ms2)	822.75 [281.14; 1294.53]	944.42 [445.04; 1418.99]	825.8 [370.18; 1418.86]	891.19 [368.51; 1370.69]	732,53 [294,82; 1361,54]
HF [FR] (ms2)	528.07 [222.65; 809.81]	588.69 [283.19; 885.73]	522.09 [260.78; 894.14]	567.63 [275.47; 884.04]	479,56 [242,93; 891,13]
LFnu (nu)	58.2 [46.13; 70.57]	54.67 [42.79; 65.19]	49.85 [35.87; 63.44]	56.64 [44.33; 69.23]	53,78 [36,78; 68,28]
LFnu [FR] (nu)	67.6 [53.78; 78.37]	65.28 [51.35; 76.24]	59.83 [43.44; 74.86]	65.67 [51.9; 77.62]	60,93 [43,22; 75,93]
HFnu (nu)	41.8 [29.43; 53.87]	45.33 [34.81; 57.21]	50.15 [36.56; 64.13]	43.36 [30.77; 55.67]	46,22 [31,72; 63,22]
HFnu [FR] (nu)	32.4 [21.63; 46.22]	34.72 [23.76; 48.65]	40.17 [25.14; 56.56]	34.33 [22.38; 48.1]	39,07 [24,07; 56,78]
LF/HF (a.u.)	1.39 [0.86; 2.4]	1.21 [0.75; 1.87]	0.99 [0.56; 1.74]	1.31 [0.8; 2.25]	1,16 [0,58; 2,15]
LF/HF [FR] (a.u.)	2.09 [1.16; 3.62]	1.88 [1.06; 3.21]	1.49 [0.77; 2.98]	1.91 [1.08; 3.47]	1,56 [0,76; 3,15]
Non-linear features
ApEn (a.u.)	1.06 [0.99; 1.12]	1.12 [1.03; 1.18]	0.72 [0.57; 0.84]	1.06 [0.98; 1.12]	0,54 [0,46; 0,62]
SampEn (a.u.)	1.63 [1.32; 1.83]	1.57 [1.27; 1.8]	1.46 [1.19; 1.82]	1.64 [1.34; 1.83]	1,62 [1,37; 2,06]
DFA-a1 (a.u.)	1.03 [0.87; 1.25]	0.97 [0.83; 1.13]	0.91 [0.72; 1.13]	1.01 [0.85; 1.2]	0,98 [0,75; 1,23]
SD1 (ms)	50.12 [27.77; 62.9]	54.51 [36.22; 67.37]	51.16 [34.31; 66.91]	51.88 [31.1; 65.44]	47,15 [28,85; 64,78]
SD2 (ms)	95 [72.33; 115.73]	97.19 [75.25; 117.36]	84.82 [62.04; 107.92]	96.94 [75.03; 117.39]	83,76 [60,63; 107,03]
SD1/SD2 (a.u.)	0.49 [0.33; 0.62]	0.56 [0.43; 0.65]	0.6 [0.49; 0.74]	0.51 [0.35; 0.63]	0,55 [0,39; 0,7]
S (ms)	14523 [6674; 216048]	16346 [9087; 23933]	13568 [7419; 21092]	15361 [7549; 23079]	12128 [6030; 19825]
CSI (a.u.)	2.04 [1.62; 2.99]	1.78 [1.54; 2.3]	1.66 [1.35; 2.06]	1.97 [1.6; 2.83]	1,83 [1,43; 2,57]
CVI (a.u.)	4.87 [4.53; 5.04]	4.92 [4.67; 5.09]	4.84 [4.58; 5.03]	4.89 [4.58; 5.07]	4,79 [4,49; 5]
AC (ms)	5.36 [2.11; 8.4]	4.04 [1.29; 7.09]	3.29 [0.32; 7.86]	5.35 [1.65; 8.16]	4,71 [0,47; 8,41]
DC (ms)	5.16 [2.04; 8.34]	4.46 [1.93; 7.55]	3.66 [0; 7.78]	4.92 [1.59; 8.14]	4,22 [0,12; 8,34]
Ca (a.u.)	0.51 [0.49; 0.54]	0.5 [0.49; 0.52]	0.51 [0.48; 0.53]	0.5 [0.48; 0.53]	0,51 [0,47; 0,54]
Cd (a.u.)	0.49 [0.46; 0.51]	0.5 [0.48; 0.51]	0.49 [0.47; 0.52]	0.5 [0.47; 0.52]	0,49 [0,46; 0,53]
SDNNa (ms)	54.93 [40.29; 66.33]	56.26 [43.78; 67.8]	52.06 [36.81; 63.2]	55.61 [42.13; 67.33]	50,86 [35,42; 62,91]
SDNNd (ms)	53.71 [40.45; 64.75]	56.48 [44.24; 67.26]	50.52 [36.97; 61.82]	54.81 [42.63; 66.45]	49,19 [35,01; 60,21]
Visibility graph features
MD-VG (°)	5.39 [4.89; 6.07]	4.99 [4.71; 5.28]	3,31 [2,97 ;3,7]	5.31 [4.83; 5.89]	3,51 [3,08; 4,1]
MD-HVG (°)	3.22 [3.09; 3.29]	2.89 [2.72; 2.99]	1,82 [1,68 ;1,98]	3.21 [3.07; 3.28]	2,07 [1,9; 2,21]
Gamma-VG (a.u.)	-1.66 [-1.81; -1.43]	-1.84 [-1.94; -1.74]	-0,99 [-1,14 ;-0,83]	-1.7 [-1.82;-1.51]	-0,86 [-1,05; -0,64]
Gamma-HVG (a.u.)	-2.58 [-2.8; -2.38]	-2.93 [-3.23; -2.64]	-1,95 [-2,23 ;-1,64]	-2.62 [-2.82;-2.39]	-1,68 [-1,87; -1,46]
C-VG (a.u.)	0.65 [0.64; 0.67]	0.65 [0.63; 0.67]	0,44 [0,4 ;0,47]	0.65 [0.63; 0.67]	0,33 [0,3; 0,35]
C-HVG (a.u.)	0.51 [0.47; 0.53]	0.41 [0.36; 0.45]	0,26 [0,23 ;0,3]	0.51 [0.47; 0.53]	0,45 [0,41; 0,48]
Tr-VG (a.u.)	0.52 [0.49; 0.55]	0.48 [0.46; 0.5]	0,46 [0,43 ;0,49]	0.51 [0.48; 0.54]	0,49 [0,45; 0,53]
Tr-HVG (a.u.)	0.39 [0.38; 0.4]	0.33 [0.3; 0.35]	0,33 [0,3 ;0,36]	0.39 [0.38; 0.4]	0,39 [0,37; 0,4]
r-VG (a.u.)	0.05 [0.01; 0.1]	0 [-0.04; 0.04]	-0,13 [-0,21 ;-0,06]	0.05 [0.01; 0.09]	-0,09 [-0,16; 0]
r-HVG (a.u.)	0.08 [0.04; 0.12]	0.06 [0.01; 0.1]	-0,05 [-0,14 ;0,02]	0.08 [0.04; 0.12]	-0,03 [-0,12; 0,04]
