# Supplementary material for: Validity of Ultra-Short-Term HRV Analysis Using PPG—A Preliminary Study
Source: Sensors (Basel). 2022 Oct 20;22(20):7995. doi: 10.3390/s22207995 (PMC9611389; doi:10.3390/s22207995)
Supplement: Supplementary file 1 [file sensors-22-07995-s001.zip › Table S2. Statistical comparisons between HRV features from ECG and PPG.xlsx]

## Sheet: Table S2-A
Table S2-A. Statistical comparisons between HRV features extracted from ECG recordings (5 min 30 s) and those extracted from PPG recordings
	PPG 5 min 30 s - 25 Hz						PPG 1 min 30 s - 25 Hz						PPG 5 min 30 s - 200 Hz						PPG 1 min 30 s - 200 Hz
	Mean Bias (95% LoA) - log	Within-subject SD - log	Correlation coefficient [95% CI]	Cliff's delta	Cliff's result	TOST p_value	Mean Bias (95% LoA) - log	Within-subject SD - log	Correlation coefficient [95% CI]	Cliff's delta	Cliff's result	TOST p_value	Mean Bias (95% LoA) -log	Within-subject SD - log	Correlation coefficient [95% CI]	Cliff's delta	Cliff's result	TOST p_value	Mean Bias (95% LoA) -log	Within-subject SD - log	Correlation coefficient [95% CI]	Cliff's delta	Cliff's result	TOST p_value
Time-domain features
MeanNN	0 [-0.01; 0.01]	0 [0; 0.01]	1 [1.0; 1.0]	0	negligible	1.35E-75	0 [-0.04; 0.04]	0.02 [0.02; 0.02]	0.98 [0.97; 0.98]	0	negligible	1.68E-62	0 [-0.01; 0.01]	0 [0; 0.01]	1 [1.0; 1.0]	0	negligible	1.35E-75	0 [-0.04; 0.04]	0.02 [0.02; 0.02]	0.98 [0.97; 0.98]	0	negligible	1.68E-62
MedianNN	0 [-0.02; 0.02]	0.01 [0.01; 0.01]	0.99 [0.99; 0.99]	0	negligible	1.35E-75	0 [-0.05; 0.05]	0.02 [0.02; 0.03]	0.97 [0.96; 0.98]	0	negligible	1.69E-62	0 [-0.01; 0.01]	0 [0; 0]	1 [1.0; 1.0]	0	negligible	1.35E-75	0 [-0.04; 0.05]	0.02 [0.02; 0.02]	0.98 [0.97; 0.98]	0	negligible	1.73E-62
SDNN	0.05 [-0.12; 0.22]	0.08 [0.08; 0.09]	0.97 [0.97; 0.98]	-0.08	negligible	3.70E-52	-0.02 [-0.5; 0.46]	0.24 [0.23; 0.27]	0.73 [0.68; 0.77]	0.04	negligible	1.56E-15	0.02 [-0.12; 0.17]	0.07 [0.07; 0.08]	0.98 [0.97; 0.98]	-0.04	negligible	1.65E-64	-0.06 [-0.56; 0.44]	0.25 [0.24; 0.28]	0.74 [0.68; 0.78]	0.08	negligible	2.70E-09
CVNN	0.05 [-0.12; 0.22]	0.09 [0.08; 0.1]	0.96 [0.95; 0.96]	-0.09	negligible	5.41E-48	-0.02 [-0.5; 0.45]	0.24 [0.23; 0.27]	0.65 [0.59; 0.71]	0.04	negligible	1.37E-15	0.02 [-0.12; 0.17]	0.08 [0.07; 0.08]	0.97 [0.96; 0.97]	-0.05	negligible	3.39E-63	-0.06 [-0.55; 0.43]	0.25 [0.24; 0.28]	0.67 [0.61; 0.72]	0.09	negligible	4.71E-09
IQRNN	0.05 [-0.39; 0.48]	0.22 [0.21; 0.25]	0.79 [0.76; 0.83]	-0.06	negligible	3.89E-08	-0.03 [-0.63; 0.58]	0.31 [0.29; 0.33]	0.19 [0.09; 0.28]	0.02	negligible	3.63E-10	0.04 [-0.08; 0.16]	0.06 [0.06; 0.07]	0.98 [0.98; 0.99]	-0.05	negligible	4.77E-68	-0.03 [-0.46; 0.41]	0.22 [0.21; 0.25]	0.79 [0.75; 0.83]	0.03	negligible	1.74E-16
RMSSD	0.18 [-0.24; 0.61]	0.15 [0.14; 0.17]	0.93 [0.91; 0.94]	-0.18	small	1	0.18 [-0.33; 0.69]	0.21 [0.2; 0.23]	0.78 [0.73; 0.81]	-0.17	small	1	0.06 [-0.16; 0.29]	0.11 [0.1; 0.12]	0.95 [0.93; 0.95]	-0.07	negligible	8.01E-53	0.03 [-0.39; 0.46]	0.22 [0.2; 0.24]	0.79 [0.75; 0.82]	-0.04	negligible	1.22E-20
SDSD	0.18 [-0.24; 0.61]	0.15 [0.14; 0.17]	0.93 [0.91; 0.94]	-0.18	small	1	0.18 [-0.33; 0.69]	0.21 [0.2; 0.23]	0.78 [0.73; 0.81]	-0.17	small	1	0.06 [-0.16; 0.29]	0.11 [0.1; 0.12]	0.95 [0.93; 0.95]	-0.07	negligible	7.70E-53	0.04 [-0.39; 0.46]	0.22 [0.2; 0.24]	0.79 [0.75; 0.83]	-0.04	negligible	9.73E-19
CVSD	0.18 [-0.25; 0.61]	0.15 [0.14; 0.17]	0.85 [0.83; 0.88]	-0.18	small	1	0.18 [-0.33; 0.68]	0.21 [0.19; 0.22]	0.62 [0.55; 0.68]	-0.17	small	1	0.06 [-0.17; 0.29]	0.11 [0.1; 0.12]	0.91 [0.89; 0.92]	-0.07	negligible	1.19E-49	0.03 [-0.38; 0.45]	0.21 [0.2; 0.23]	0.69 [0.63; 0.74]	-0.03	negligible	1.83E-21
pNN20	0.2 [-0.58; 0.97]	0.28 [0.26; 0.31]	0.67 [0.61; 0.72]	-0.19	small	0.33	0.2 [-0.59; 0.98]	0.29 [0.27; 0.32]	0.57 [0.5; 0.64]	-0.16	small	0.62	0.1 [-0.25; 0.45]	0.14 [0.13; 0.15]	0.95 [0.94; 0.96]	-0.11	negligible	5.12E-30	0.09 [-0.33; 0.5]	0.18 [0.17; 0.19]	0.86 [0.84; 0.89]	-0.07	negligible	1.19E-18
pNN50	0.18 [-0.84; 1.2]	0.37 [0.34; 0.4]	0.91 [0.89; 0.92]	0.06	negligible	3.41E-17	0.16 [-1.01; 1.33]	0.48 [0.45; 0.53]	0.75 [0.7; 0.79]	0.06	negligible	2.56E-07	0.12 [-0.36; 0.59]	0.21 [0.2; 0.23]	0.95 [0.94; 0.96]	-0.03	negligible	9.40E-58	0.08 [-0.83; 0.98]	0.45 [0.42; 0.52]	0.79 [0.74; 0.82]	-0.01	negligible	4.43E-22
HTI	-1.24 [-1.48; -1]	0.12 [0.11; 0.13]	0.89 [0.87; 0.91]	1	large	1	-1.34 [-1.74; -0.95]	0.2 [0.19; 0.22]	0.71 [0.66; 0.76]	1	large	1	-0.12 [-0.38; 0.15]	0.13 [0.13; 0.15]	0.86 [0.83; 0.88]	0.21	small	0.91	-0.37 [-0.84; 0.09]	0.23 [0.22; 0.25]	0.58 [0.51; 0.65]	0.61	large	1
Skewness	-0.09 [-1.88; 1.7]	0.91 [0.87; 1.02]	0.68 [0.63; 0.73]	0.02	negligible	1	-0.32 [-3.29; 2.65]	1.49 [1.4; 1.64]	0.21 [0.11; 0.3]	-0.02	negligible	0.68	-0.02 [-1.54; 1.51]	0.78 [0.74; 0.87]	0.76 [0.72; 0.8]	0.01	negligible	1	-0.23 [-3.14; 2.69]	1.49 [1.41; 1.64]	0.24 [0.14; 0.33]	-0.04	negligible	0.84
Kurtosis	-0.01 [-2.3; 2.28]	1.17 [1.11; 1.3]	0.66 [0.6; 0.71]	0	negligible	0.003	-0.43 [-3.93; 3.07]	1.68 [1.58; 1.84]	0.16 [0.06; 0.26]	0.3	small	1	0.06 [-1.63; 1.75]	0.85 [0.8; 0.94]	0.79 [0.75; 0.82]	-0.01	negligible	4.25E-15	-0.38 [-3.84; 3.08]	1.66 [1.56; 1.82]	0.18 [0.08; 0.27]	0.3	small	1
Frequency-domain features
LF	0.04 [-0.39; 0.47]	0.21 [0.2; 0.24]	0.96 [0.95; 0.96]	-0.04	negligible	3.48E-21	-0.15 [-1.43; 1.12]	0.65 [0.62; 0.72]	0.68 [0.62; 0.73]	0.08	negligible	0.005	0.03 [-0.38; 0.45]	0.21 [0.2; 0.23]	0.96 [0.95; 0.97]	-0.03	negligible	1.74E-27	-0.19 [-1.49; 1.11]	0.66 [0.63; 0.73]	0.68 [0.62; 0.73]	0.09	negligible	0.011
LF [FR]	0.04 [-0.39; 0.47]	0.22 [0.21; 0.24]	0.95 [0.95; 0.96]	-0.04	negligible	2.24E-22	-0.16 [-1.45; 1.13]	0.66 [0.62; 0.74]	0.68 [0.62; 0.73]	0.09	negligible	0.008	0.03 [-0.39; 0.45]	0.21 [0.2; 0.23]	0.96 [0.95; 0.96]	-0.03	negligible	9.19E-29	-0.19 [-1.5; 1.12]	0.67 [0.63; 0.75]	0.68 [0.62; 0.73]	0.1	negligible	0.016
HF	0.27 [-0.51; 1.06]	0.3 [0.29; 0.34]	0.85 [0.82; 0.87]	-0.14	small	1	0.23 [-0.85; 1.31]	0.49 [0.46; 0.53]	0.58 [0.51; 0.65]	-0.11	negligible	0.9	0.14 [-0.49; 0.78]	0.3 [0.29; 0.34]	0.84 [0.81; 0.87]	-0.07	negligible	0.004	0.08 [-0.98; 1.14]	0.53 [0.5; 0.58]	0.58 [0.51; 0.64]	-0.03	negligible	8.13E-06
HF [FR]	0.19 [-0.38; 0.76]	0.27 [0.26; 0.3]	0.93 [0.92; 0.94]	-0.09	negligible	0.97	0.13 [-0.86; 1.12]	0.5 [0.47; 0.56]	0.74 [0.7; 0.79]	-0.05	negligible	0.048	0.13 [-0.38; 0.63]	0.25 [0.24; 0.27]	0.94 [0.92; 0.95]	-0.06	negligible	0.007	0.06 [-0.91; 1.02]	0.49 [0.46; 0.56]	0.78 [0.73; 0.81]	-0.02	negligible	1.72E-04
LFnu	-0.08 [-0.33; 0.16]	0.11 [0.1; 0.12]	0.92 [0.91; 0.93]	0.14	small	1.15E-09	-0.17 [-0.75; 0.41]	0.29 [0.27; 0.32]	0.65 [0.59; 0.71]	0.25	small	0.99	-0.04 [-0.21; 0.13]	0.08 [0.08; 0.09]	0.95 [0.94; 0.96]	0.06	negligible	3.12E-45	-0.12 [-0.65; 0.42]	0.27 [0.26; 0.3]	0.67 [0.61; 0.72]	0.15	small	0.018
LFnu [FR]	-0.04 [-0.22; 0.14]	0.08 [0.08; 0.09]	0.96 [0.95; 0.96]	0.08	negligible	1.57E-46	-0.12 [-0.64; 0.41]	0.27 [0.25; 0.3]	0.71 [0.65; 0.76]	0.17	small	0.028	-0.03 [-0.18; 0.12]	0.07 [0.07; 0.08]	0.97 [0.96; 0.97]	0.05	negligible	3.59E-56	-0.11 [-0.63; 0.41]	0.26 [0.25; 0.3]	0.73 [0.67; 0.77]	0.14	negligible	5.07E-04
HFnu	0.16 [-0.42; 0.73]	0.22 [0.21; 0.24]	0.79 [0.75; 0.82]	-0.14	small	0.11	0.2 [-0.65; 1.05]	0.37 [0.35; 0.4]	0.52 [0.44; 0.59]	-0.25	small	1	0.07 [-0.38; 0.53]	0.22 [0.2; 0.24]	0.8 [0.76; 0.83]	-0.06	negligible	2.90E-30	0.12 [-0.69; 0.93]	0.4 [0.37; 0.43]	0.51 [0.42; 0.58]	-0.15	small	0.71
HFnu [FR]	0.12 [-0.35; 0.58]	0.21 [0.2; 0.23]	0.92 [0.91; 0.93]	-0.08	negligible	2.72E-11	0.17 [-0.75; 1.08]	0.45 [0.43; 0.51]	0.67 [0.61; 0.72]	-0.17	small	0.99	0.06 [-0.31; 0.44]	0.18 [0.17; 0.2]	0.94 [0.93; 0.95]	-0.05	negligible	2.18E-27	0.12 [-0.75; 0.99]	0.44 [0.41; 0.5]	0.72 [0.66; 0.76]	-0.14	negligible	0.86
LF/HF	-0.24 [-1.01; 0.54]	0.3 [0.28; 0.33]	0.86 [0.83; 0.88]	0.14	small	0.81	-0.37 [-1.7; 0.96]	0.62 [0.58; 0.67]	0.6 [0.53; 0.66]	0.25	small	1	-0.11 [-0.71; 0.49]	0.28 [0.27; 0.32]	0.87 [0.85; 0.9]	0.06	negligible	3.85E-10	-0.24 [-1.49; 1.01]	0.63 [0.59; 0.69]	0.59 [0.52; 0.65]	0.15	small	0.32
LF/HF [FR]	-0.16 [-0.76; 0.44]	0.27 [0.26; 0.3]	0.94 [0.93; 0.95]	0.08	negligible	4.68E-03	-0.28 [-1.62; 1.06]	0.67 [0.63; 0.76]	0.69 [0.64; 0.74]	0.17	small	0.74	-0.1 [-0.59; 0.4]	0.24 [0.23; 0.26]	0.95 [0.94; 0.96]	0.05	negligible	1.85E-11	-0.23 [-1.53; 1.07]	0.66 [0.62; 0.75]	0.73 [0.67; 0.77]	0.14	negligible	0.19
Non-linear features
ApEn	0.07 [-0.13; 0.27]	0.1 [0.09; 0.11]	0.29 [0.2; 0.37]	-0.31	moderate	2.85E-14	-0.4 [-1; 0.19]	0.23 [0.22; 0.25]	0.22 [0.12; 0.32]	0.91	large	1	0 [-0.16; 0.16]	0.08 [0.07; 0.09]	0.6 [0.54; 0.66]	0.01	negligible	7.29E-67	-0.69 [-1.28; -0.09]	0.26 [0.24; 0.28]	0.06 [-0.04; 0.16]	0.99	large	1
SampEn	-0.03 [-0.41; 0.36]	0.19 [0.18; 0.21]	0.2 [0.1; 0.28]	0.09	negligible	4.99E-17	-0.03 [-0.56; 0.49]	0.27 [0.25; 0.3]	0.11 [0.01; 0.21]	0.11	negligible	1.12E-06	0.02 [-0.23; 0.26]	0.12 [0.11; 0.13]	0.71 [0.66; 0.75]	-0.01	negligible	8.72E-46	0.07 [-0.43; 0.57]	0.25 [0.23; 0.28]	0.38 [0.28; 0.46]	-0.13	negligible	0.095
DFA-a1	-0.08 [-0.3; 0.14]	0.09 [0.09; 0.1]	0.88 [0.85; 0.9]	0.17	small	2.80E-08	-0.14 [-0.57; 0.28]	0.21 [0.2; 0.23]	0.63 [0.56; 0.68]	0.26	small	0.99	-0.03 [-0.17; 0.11]	0.07 [0.07; 0.08]	0.93 [0.91; 0.94]	0.05	negligible	7.87E-56	-0.09 [-0.46; 0.29]	0.19 [0.18; 0.21]	0.66 [0.6; 0.71]	0.14	negligible	3.65E-05
SD1	0.18 [-0.24; 0.61]	0.15 [0.14; 0.17]	0.93 [0.91; 0.94]	-0.18	small	1	0.18 [-0.33; 0.69]	0.21 [0.2; 0.23]	0.78 [0.73; 0.81]	-0.17	small	1	0.06 [-0.16; 0.29]	0.11 [0.1; 0.12]	0.95 [0.93; 0.95]	-0.07	negligible	7.70E-53	0.04 [-0.39; 0.46]	0.22 [0.2; 0.24]	0.79 [0.75; 0.83]	-0.04	negligible	9.73E-19
SD2	0.03 [-0.13; 0.19]	0.08 [0.08; 0.09]	0.97 [0.97; 0.98]	-0.05	negligible	7.79E-61	-0.07 [-0.61; 0.46]	0.27 [0.26; 0.3]	0.72 [0.66; 0.76]	0.11	negligible	1.08E-05	0.02 [-0.13; 0.17]	0.07 [0.07; 0.08]	0.98 [0.97; 0.98]	-0.03	negligible	1.98E-63	-0.09 [-0.63; 0.45]	0.28 [0.26; 0.3]	0.72 [0.67; 0.77]	0.13	negligible	3.72E-04
SD1/SD2	0.16 [-0.23; 0.54]	0.12 [0.12; 0.14]	0.86 [0.83; 0.88]	-0.21	small	0.98	0.25 [-0.32; 0.81]	0.23 [0.21; 0.25]	0.6 [0.53; 0.66]	-0.36	medium	1	0.04 [-0.15; 0.24]	0.09 [0.09; 0.1]	0.92 [0.91; 0.93]	-0.05	negligible	1.12E-55	0.12 [-0.3; 0.54]	0.21 [0.19; 0.23]	0.67 [0.6; 0.72]	-0.18	small	0.99
S	0.21 [-0.3; 0.72]	0.21 [0.2; 0.23]	0.96 [0.95; 0.97]	-0.13	small	1	0.11 [-0.77; 0.99]	0.43 [0.4; 0.47]	0.75 [0.71; 0.79]	-0.05	negligible	1.47E-03	0.08 [-0.25; 0.41]	0.16 [0.15; 0.18]	0.97 [0.96; 0.97]	-0.06	negligible	6.34E-21	-0.05 [-0.93; 0.83]	0.45 [0.42; 0.5]	0.76 [0.72; 0.8]	0.04	negligible	8.17E-09
CSI	-0.16 [-0.54; 0.23]	0.12 [0.12; 0.14]	0.86 [0.83; 0.88]	0.21	small	0.94	-0.25 [-0.81; 0.32]	0.23 [0.21; 0.25]	0.6 [0.53; 0.66]	0.36	medium	1	-0.04 [-0.24; 0.15]	0.09 [0.09; 0.1]	0.92 [0.91; 0.93]	0.05	negligible	9.61E-29	-0.12 [-0.54; 0.3]	0.21 [0.19; 0.23]	0.67 [0.6; 0.72]	0.18	small	0.559
CVI	0.02 [-0.03; 0.07]	0.02 [0.02; 0.02]	0.96 [0.95; 0.97]	-0.13	small	1.42E-75	0.01 [-0.07; 0.1]	0.04 [0.04; 0.05]	0.75 [0.7; 0.79]	-0.05	negligible	9.30E-62	0.01 [-0.02; 0.04]	0.02 [0.01; 0.02]	0.97 [0.96; 0.97]	-0.06	negligible	1.35E-75	-0.01 [-0.09; 0.08]	0.04 [0.04; 0.05]	0.76 [0.72; 0.8]	0.04	negligible	1.17E-61
AC	-0.13 [-1.57; 1.31]	0.7 [0.66; 0.76]	0.4 [0.31; 0.47]	0.12	small	1	-0.01 [-2.32; 2.31]	1.12 [1.05; 1.21]	0.07 [-0.04; 0.17]	0.15	small	1	-0.04 [-1.31; 1.23]	0.65 [0.61; 0.72]	0.75 [0.71; 0.79]	0.03	negligible	6.74E-10	0 [-3.73; 3.73]	1.9 [1.8; 2.1]	0.12 [0.01; 0.22]	0.07	negligible	0.746
DC	-0.02 [-1.5; 1.46]	0.69 [0.64; 0.76]	0.39 [0.31; 0.46]	0.06	negligible	0.24	-0.02 [-2.27; 2.23]	1.07 [1; 1.2]	0.15 [0.05; 0.25]	0.13	negligible	0.98	-0.06 [-1.43; 1.32]	0.7 [0.66; 0.78]	0.74 [0.69; 0.78]	0.03	negligible	2.11E-06	0.04 [-2.23; 2.31]	1.14 [1.07; 1.25]	0.28 [0.18; 0.37]	0.08	negligible	0.814
Ca	-0.01 [-0.18; 0.15]	0.08 [0.08; 0.09]	0.45 [0.37; 0.52]	0.17	small	1.37E-57	0 [-0.23; 0.23]	0.12 [0.11; 0.13]	0.12 [0.02; 0.22]	0.08	negligible	1.09E-40	-0.01 [-0.15; 0.13]	0.07 [0.07; 0.08]	0.68 [0.62; 0.72]	0.09	negligible	1.16E-64	0 [-0.26; 0.26]	0.13 [0.12; 0.14]	0.18 [0.08; 0.28]	0.03	negligible	2.69E-34
Cd	0.02 [-0.15; 0.18]	0.08 [0.08; 0.09]	0.42 [0.34; 0.5]	0.17	small	8.58E-56	0 [-0.27; 0.26]	0.13 [0.13; 0.15]	0.1 [0.0; 0.2]	-0.08	negligible	1.45E-39	0.01 [-0.13; 0.15]	0.07 [0.07; 0.08]	0.67 [0.61; 0.71]	-0.09	negligible	1.40E-63	-0.01 [-0.32; 0.3]	0.15 [0.14; 0.17]	0.17 [0.07; 0.27]	-0.03	negligible	2.95E-33
SDNNa	0.05 [-0.14; 0.23]	0.1 [0.09; 0.11]	0.97 [0.96; 0.97]	-0.06	negligible	6.35E-51	-0.03 [-0.52; 0.46]	0.25 [0.24; 0.28]	0.73 [0.68; 0.77]	0.04	negligible	7.16E-14	0.02 [-0.14; 0.17]	0.08 [0.07; 0.09]	0.97 [0.97; 0.98]	-0.03	negligible	3.98E-63	-0.06 [-0.58; 0.45]	0.26 [0.25; 0.29]	0.74 [0.69; 0.78]	0.08	negligible	1.61E-08
SDNNd	0.06 [-0.12; 0.24]	0.09 [0.09; 0.1]	0.96 [0.96; 0.97]	-0.1	negligible	5.26E-35	-0.02 [-0.51; 0.46]	0.25 [0.23; 0.27]	0.72 [0.66; 0.76]	0.04	negligible	2.33E-15	0.03 [-0.13; 0.19]	0.08 [0.08; 0.09]	0.97 [0.96; 0.97]	-0.05	negligible	7.32E-55	-0.07 [-0.58; 0.44]	0.26 [0.24; 0.28]	0.72 [0.66; 0.76]	0.1	negligible	9.26E-08
Visibility graph features
MD-VG	-0.09 [-0.3; 0.12]	0.06 [0.06; 0.07]	0.73 [0.69; 0.77]	0.38	medium	1.06E-04	-0.5 [-0.78; -0.22]	0.12 [0.11; 0.13]	0.58 [0.51; 0.65]	0.99	large	1	-0.02 [-0.1; 0.05]	0.04 [0.03; 0.04]	0.92 [0.9; 0.93]	0.07	negligible	7.10E-72	-0.42 [-0.67; -0.17]	0.12 [0.11; 0.13]	0.68 [0.62; 0.73]	0.92	large	1
MD-HVG	-0.11 [-0.2; -0.02]	0.04 [0.04; 0.04]	0.4 [0.31; 0.47]	0.86	large	0.99	-0.55 [-0.73; -0.37]	0.07 [0.07; 0.08]	0.24 [0.14; 0.33]	1	large	1	0 [-0.06; 0.06]	0.03 [0.03; 0.03]	0.59 [0.52; 0.64]	0.04	negligible	2.69E-74	-0.43 [-0.62; -0.24]	0.08 [0.08; 0.09]	0.15 [0.05; 0.25]	0.99	large	1
Gamma-VG	0.15 [-0.23; 0.52]	0.14 [0.14; 0.16]	0.22 [0.13; 0.31]	0.51	large	1	-0.49 [-1.16; 0.18]	0.32 [0.31; 0.36]	0.03 [-0.07; 0.14]	-0.88	large	1	0.04 [-0.23; 0.3]	0.13 [0.13; 0.15]	0.45 [0.37; 0.52]	0.08	negligible	1	-0.76 [-1.88; 0.35]	0.55 [0.52; 0.6]	0.17 [0.07; 0.27]	-0.93	large	1
Gamma-HVG	0.13 [-0.27; 0.52]	0.2 [0.19; 0.22]	0.06 [-0.04; 0.15]	0.46	medium	1	-0.31 [-0.93; 0.31]	0.31 [0.3; 0.34]	0 [-0.11; 0.1]	-0.74	large	1	0.01 [-0.35; 0.38]	0.19 [0.18; 0.21]	0.16 [0.07; 0.25]	0.04	negligible	1	-0.46 [-1.01; 0.09]	0.28 [0.26; 0.3]	0.07 [-0.03; 0.18]	-0.95	large	1
C-VG	0 [-0.07; 0.06]	0.03 [0.03; 0.04]	0.72 [0.67; 0.76]	0.06	negligible	2.70E-74	-0.39 [-0.6; -0.18]	0.1 [0.09; 0.11]	0.31 [0.22; 0.4]	1	large	1	0 [-0.07; 0.06]	0.03 [0.03; 0.04]	0.74 [0.69; 0.78]	0.08	negligible	2.70E-74	-0.38 [-0.6; -0.16]	0.1 [0.1; 0.11]	0.36 [0.27; 0.45]	1	large	1
C-HVG	-0.22 [-0.44; -0.01]	0.09 [0.09; 0.1]	0.35 [0.27; 0.43]	0.79	large	1	-0.65 [-1; -0.29]	0.17 [0.16; 0.19]	0.03 [-0.08; 0.13]	1	large	1	0 [-0.1; 0.09]	0.05 [0.04; 0.05]	0.66 [0.6; 0.71]	0.02	negligible	4.35E-74	-0.42 [-0.66; -0.18]	0.11 [0.11; 0.12]	0.01 [-0.09; 0.12]	0.99	large	1
Tr-VG	-0.07 [-0.21; 0.08]	0.05 [0.05; 0.05]	0.61 [0.55; 0.67]	0.5	large	3.03E-20	-0.11 [-0.35; 0.12]	0.1 [0.1; 0.11]	0.31 [0.22; 0.4]	0.63	large	0.86	-0.01 [-0.07; 0.04]	0.03 [0.03; 0.03]	0.88 [0.85; 0.9]	0.1	negligible	2.34E-75	-0.06 [-0.23; 0.11]	0.09 [0.08; 0.09]	0.45 [0.37; 0.53]	0.35	medium	5.62E-21
Tr-HVG	-0.19 [-0.42; 0.03]	0.07 [0.07; 0.08]	0.02 [-0.07; 0.12]	0.98	large	1	-0.2 [-0.48; 0.09]	0.12 [0.11; 0.13]	0.02 [-0.08; 0.12]	0.91	large	1	-0.01 [-0.05; 0.04]	0.02 [0.02; 0.02]	0.71 [0.66; 0.76]	0.12	negligible	1.35E-75	-0.02 [-0.15; 0.1]	0.06 [0.06; 0.07]	0.35 [0.25; 0.44]	0.19	small	2.25E-53
r-VG	-0.34 [-3.03; 2.35]	1.37 [1.3; 1.53]	0.14 [0.04; 0.23]	0.51	large	1	0.74 [-2.54; 4.01]	1.53 [1.44; 1.67]	-0.06 [-0.16; 0.05]	0.87	large	1	-0.06 [-2.05; 1.92]	1.01 [0.96; 1.13]	0.52 [0.45; 0.58]	0.03	negligible	8.56E-03	0.51 [-2.82; 3.85]	1.58 [1.49; 1.73]	-0.07 [-0.17; 0.04]	0.73	large	1
r-HVG	-0.34 [-2.93; 2.26]	1.28 [1.22; 1.43]	0.23 [0.14; 0.32]	0.2	small	1	0.07 [-3.03; 3.18]	1.46 [1.37; 1.6]	0.02 [-0.08; 0.13]	0.71	large	1	0.03 [-1.82; 1.89]	0.95 [0.9; 1.06]	0.51 [0.44; 0.58]	0.01	negligible	5.72E-05	0.05 [-3.27; 3.37]	1.54 [1.45; 1.69]	-0.1 [-0.21; -0.0]	0.63	large	1

## Sheet: Table S2-B
Table S2-B. Statistical comparisons between HRV features extracted from 5 min 30 s PPG recordings and those extracted from 1 min 30 s recordings
	PPG 1 min 30 s Vs PPG 5 min 30 s - 25 Hz						PPG 1 min 30 s Vs PPG 5 min 30 s - 200 Hz
	Mean Bias (95% LoA) - log	Within-subject SD - log	Correlation coefficient [95% CI]	Cliff's delta	Cliff's result	TOST p_value	Mean Bias (95% LoA) -log	Within-subject SD - log	Correlation coefficient [95% CI]	Cliff's delta	Cliff's result	TOST p_value
Time-domain features
MeanNN	0 [-0.04; 0.04]	0.02 [0.02; 0.02]	0.98 [0.97; 0.98]	0	negligible	1.65E-62	0 [-0.04; 0.04]	0.02 [0.02; 0.02]	0.98 [0.97; 0.98]	0	negligible	1.64E-62
MedianNN	0 [-0.05; 0.05]	0.03 [0.02; 0.03]	0.97 [0.96; 0.97]	0	negligible	1.43E-62	0 [-0.04; 0.04]	0.02 [0.02; 0.02]	0.98 [0.97; 0.98]	0	negligible	1.67E-62
SDNN	-0.08 [-0.51; 0.35]	0.22 [0.2; 0.24]	0.72 [0.67; 0.77]	0.12	negligible	4.75E-07	-0.09 [-0.56; 0.38]	0.24 [0.22; 0.26]	0.72 [0.67; 0.77]	0.12	negligible	8.86E-06
CVNN	-0.08 [-0.5; 0.35]	0.21 [0.2; 0.24]	0.65 [0.59; 0.71]	0.13	negligible	1.00E-06	-0.09 [-0.55; 0.38]	0.23 [0.22; 0.25]	0.65 [0.59; 0.71]	0.13	negligible	2.02E-05
IQRNN	-0.07 [-0.72; 0.58]	0.33 [0.31; 0.36]	0.6 [0.53; 0.66]	0.12	negligible	9.57E-05	-0.06 [-0.49; 0.36]	0.22 [0.2; 0.23]	0.75 [0.7; 0.79]	0.08	negligible	6.62E-09
RMSSD	-0.02 [-0.27; 0.22]	0.12 [0.11; 0.14]	0.88 [0.86; 0.9]	0.02	negligible	3.16E-38	-0.03 [-0.39; 0.32]	0.18 [0.17; 0.2]	0.88 [0.85; 0.9]	0.03	negligible	1.12E-27
SDSD	-0.02 [-0.26; 0.22]	0.12 [0.12; 0.13]	0.88 [0.86; 0.9]	0.02	negligible	1.34E-39	-0.03 [-0.39; 0.33]	0.18 [0.17; 0.2]	0.88 [0.85; 0.9]	0.02	negligible	3.90E-29
CVSD	-0.02 [-0.25; 0.2]	0.12 [0.11; 0.13]	0.82 [0.78; 0.85]	0.03	negligible	3.51E-40	-0.03 [-0.38; 0.31]	0.18 [0.17; 0.19]	0.82 [0.79; 0.85]	0.03	negligible	1.50E-29
pNN20	-0.01 [-0.14; 0.12]	0.07 [0.06; 0.07]	0.81 [0.78; 0.85]	0.04	negligible	1.12E-58	-0.02 [-0.25; 0.21]	0.12 [0.11; 0.13]	0.88 [0.85; 0.9]	0.04	negligible	2.81E-52
pNN50	-0.05 [-0.57; 0.48]	0.27 [0.25; 0.3]	0.9 [0.88; 0.92]	0.02	negligible	1.09E-25	-0.06 [-0.87; 0.75]	0.41 [0.38; 0.46]	0.91 [0.89; 0.93]	0.02	negligible	3.28E-27
HTI	-0.1 [-0.45; 0.26]	0.18 [0.17; 0.2]	0.73 [0.68; 0.77]	0.17	small	0.072	-0.25 [-0.68; 0.18]	0.22 [0.21; 0.25]	0.58 [0.51; 0.64]	0.45	medium	1
Skewness	-0.19 [-3.03; 2.65]	1.45 [1.37; 1.58]	0.59 [0.52; 0.66]	-0.05	negligible	0.873	-0.21 [-2.95; 2.53]	1.4 [1.32; 1.53]	0.62 [0.55; 0.68]	-0.05	negligible	0.899
Kurtosis	-0.32 [-3.85; 3.2]	1.72 [1.62; 1.85]	0.67 [0.61; 0.72]	0.3	small	1	-0.44 [-3.57; 2.69]	1.52 [1.4; 1.67]	0.7 [0.64; 0.75]	0.31	small	1
Frequency-domain features
LF	-0.22 [-1.43; 0.99]	0.62 [0.58; 0.67]	0.62 [0.55; 0.68]	0.11	negligible	0.084	-0.22 [-1.48; 1.03]	0.64 [0.6; 0.68]	0.61 [0.54; 0.67]	0.12	negligible	0.092
LF [FR]	-0.21 [-1.43; 1.01]	0.62 [0.58; 0.68]	0.62 [0.56; 0.68]	0.12	negligible	0.105	-0.22 [-1.48; 1.04]	0.64 [0.6; 0.7]	0.61 [0.54; 0.67]	0.13	negligible	0.117
HF	-0.07 [-0.74; 0.59]	0.34 [0.32; 0.37]	0.83 [0.79; 0.86]	0.04	negligible	2.69E-12	-0.09 [-0.92; 0.74]	0.42 [0.39; 0.46]	0.84 [0.8; 0.86]	0.04	negligible	5.12E-10
HF [FR]	-0.07 [-0.86; 0.71]	0.4 [0.37; 0.43]	0.87 [0.84; 0.89]	0.04	negligible	9.37E-11	-0.08 [-0.91; 0.75]	0.42 [0.39; 0.46]	0.88 [0.86; 0.9]	0.04	negligible	1.10E-09
LFnu	-0.09 [-0.64; 0.45]	0.28 [0.26; 0.3]	0.67 [0.61; 0.72]	0.11	negligible	1.78E-05	-0.09 [-0.61; 0.44]	0.27 [0.25; 0.28]	0.67 [0.61; 0.72]	0.09	negligible	6.57E-07
LFnu [FR]	-0.08 [-0.59; 0.42]	0.26 [0.24; 0.29]	0.73 [0.68; 0.77]	0.09	negligible	1.20E-07	-0.08 [-0.59; 0.42]	0.26 [0.24; 0.29]	0.74 [0.69; 0.78]	0.09	negligible	3.37E-08
HFnu	0.05 [-0.55; 0.65]	0.31 [0.29; 0.33]	0.67 [0.61; 0.72]	-0.11	negligible	0.002	0.05 [-0.61; 0.71]	0.33 [0.31; 0.37]	0.67 [0.61; 0.72]	-0.09	negligible	0.003
HFnu [FR]	0.06 [-0.72; 0.83]	0.4 [0.37; 0.44]	0.73 [0.68; 0.77]	-0.09	negligible	0.053	0.06 [-0.73; 0.85]	0.4 [0.38; 0.44]	0.74 [0.69; 0.78]	-0.09	negligible	0.045
LF/HF	-0.15 [-1.24; 0.95]	0.56 [0.53; 0.6]	0.61 [0.54; 0.67]	0.11	negligible	0.005	-0.14 [-1.24; 0.97]	0.56 [0.52; 0.63]	0.6 [0.53; 0.66]	0.09	negligible	6.43E-04
LF/HF [FR]	-0.15 [-1.36; 1.06]	0.62 [0.58; 0.67]	0.63 [0.56; 0.69]	0.09	negligible	0.005	-0.14 [-1.36; 1.07]	0.62 [0.59; 0.66]	0.75 [0.7; 0.79]	0.09	negligible	0.002
Non-linear features
ApEn	-0.47 [-1; 0.06]	0.2 [0.19; 0.22]	0.55 [0.48; 0.62]	0.98	large	1	-0.69 [-1.25; -0.12]	0.25 [0.23; 0.27]	0.23 [0.13; 0.33]	1	large	1
SampEn	0.01 [-0.32; 0.35]	0.17 [0.16; 0.18]	0.63 [0.56; 0.69]	-0.01	negligible	4.02E-16	0.06 [-0.42; 0.54]	0.24 [0.23; 0.27]	0.36 [0.26; 0.44]	-0.12	negligible	0.039
DFA-a1	-0.06 [-0.44; 0.32]	0.19 [0.18; 0.22]	0.66 [0.59; 0.71]	0.11	negligible	9.05E-10	-0.06 [-0.41; 0.3]	0.18 [0.17; 0.2]	0.67 [0.61; 0.72]	0.09	negligible	7.67E-13
SD1	-0.02 [-0.26; 0.22]	0.12 [0.12; 0.13]	0.88 [0.86; 0.9]	0.02	negligible	1.34E-39	-0.03 [-0.39; 0.33]	0.18 [0.17; 0.2]	0.88 [0.85; 0.9]	0.02	negligible	3.90E-29
SD2	-0.1 [-0.6; 0.4]	0.25 [0.24; 0.28]	0.7 [0.64; 0.75]	0.15	small	0.008	-0.11 [-0.62; 0.41]	0.26 [0.24; 0.28]	0.69 [0.64; 0.74]	0.16	small	0.014
SD1/SD2	0.09 [-0.31; 0.48]	0.2 [0.19; 0.22]	0.71 [0.66; 0.76]	-0.17	small	0.184	0.08 [-0.3; 0.45]	0.19 [0.18; 0.21]	0.75 [0.7; 0.79]	-0.13	negligible	0.046
S	-0.12 [-0.8; 0.56]	0.34 [0.32; 0.37]	0.77 [0.72; 0.81]	0.1	negligible	0.002	-0.14 [-0.95; 0.67]	0.41 [0.38; 0.45]	0.77 [0.72; 0.81]	0.09	negligible	0.006
CSI	-0.09 [-0.48; 0.31]	0.2 [0.19; 0.22]	0.65 [0.59; 0.71]	0.17	small	0.002	-0.08 [-0.45; 0.3]	0.19 [0.18; 0.21]	0.69 [0.63; 0.74]	0.13	negligible	3.55E-04
CVI	-0.01 [-0.07; 0.05]	0.03 [0.03; 0.04]	0.8 [0.76; 0.83]	0.1	negligible	2.89E-62	-0.01 [-0.09; 0.06]	0.04 [0.04; 0.04]	0.8 [0.75; 0.83]	0.09	negligible	2.51E-61
AC	0.23 [-3.35; 3.82]	1.81 [1.7; 2.01]	0.68 [0.62; 0.73]	0.05	negligible	0.348	0.07 [-2.2; 2.35]	1.16 [1.08; 1.3]	0.71 [0.66; 0.76]	0.05	negligible	0.440
DC	0.11 [-3.59; 3.81]	1.89 [1.75; 2.05]	0.68 [0.62; 0.73]	0.07	negligible	0.335	0.1 [-2.25; 2.45]	1.19 [1.13; 1.29]	0.66 [0.59; 0.71]	0.05	negligible	0.417
Ca	0.01 [-0.14; 0.16]	0.08 [0.07; 0.09]	0.47 [0.38; 0.54]	-0.08	negligible	3.08E-46	0.01 [-0.21; 0.23]	0.11 [0.1; 0.12]	0.4 [0.31; 0.48]	-0.04	negligible	8.65E-35
Cd	-0.02 [-0.21; 0.18]	0.1 [0.09; 0.11]	0.47 [0.38; 0.54]	0.08	negligible	3.33E-46	-0.02 [-0.28; 0.24]	0.13 [0.12; 0.14]	0.4 [0.31; 0.48]	0.04	negligible	2.51E-34
SDNNa	-0.07 [-0.51; 0.37]	0.22 [0.21; 0.24]	0.72 [0.67; 0.77]	0.11	negligible	9.58E-08	-0.08 [-0.56; 0.39]	0.24 [0.23; 0.26]	0.74 [0.69; 0.78]	0.11	negligible	1.27E-06
SDNNd	-0.08 [-0.52; 0.35]	0.22 [0.2; 0.24]	0.71 [0.65; 0.75]	0.14	negligible	4.93E-05	-0.1 [-0.59; 0.39]	0.24 [0.23; 0.26]	0.68 [0.62; 0.73]	0.15	negligible	8.05E-04
Visibility graph features
MD-VG	-0.41 [-0.65; -0.17]	0.11 [0.11; 0.12]	0.62 [0.55; 0.68]	0.99	large	1	-0.4 [-0.65; -0.15]	0.12 [0.11; 0.13]	0.72 [0.67; 0.77]	0.92	large	1
MD-HVG	-0.44 [-0.62; -0.26]	0.07 [0.07; 0.08]	0.13 [0.03; 0.23]	1	large	1	-0.43 [-0.61; -0.25]	0.07 [0.07; 0.08]	0.35 [0.26; 0.44]	1	large	1
Gamma-VG	-0.65 [-1.21; -0.1]	0.28 [0.26; 0.31]	0.31 [0.21; 0.4]	-0.99	large	1	-0.81 [-1.91; 0.3]	0.53 [0.5; 0.61]	0.23 [0.14; 0.33]	-0.97	large	1
Gamma-HVG	-0.44 [-1; 0.13]	0.29 [0.27; 0.32]	0.15 [0.04; 0.24]	-0.88	large	1	-0.47 [-0.99; 0.06]	0.26 [0.25; 0.28]	0.13 [0.02; 0.23]	-0.94	large	1
C-VG	-0.39 [-0.59; -0.19]	0.09 [0.08; 0.1]	0.48 [0.4; 0.56]	1	large	1	-0.37 [-0.58; -0.16]	0.09 [0.09; 0.1]	0.5 [0.42; 0.57]	1	large	1
C-HVG	-0.42 [-0.76; -0.09]	0.16 [0.15; 0.17]	0.29 [0.19; 0.38]	0.92	large	1	-0.42 [-0.65; -0.19]	0.1 [0.09; 0.11]	0.14 [0.04; 0.24]	0.99	large	1
Tr-VG	-0.05 [-0.23; 0.13]	0.09 [0.09; 0.1]	0.52 [0.44; 0.59]	0.3	small	5.83E-27	-0.04 [-0.2; 0.11]	0.08 [0.07; 0.09]	0.56 [0.49; 0.63]	0.28	small	2.25E-32
Tr-HVG	0 [-0.21; 0.2]	0.1 [0.1; 0.12]	0.49 [0.41; 0.57]	-0.02	negligible	2.34E-45	-0.02 [-0.13; 0.1]	0.06 [0.06; 0.06]	0.5 [0.42; 0.57]	0.11	negligible	5.37E-58
r-VG	1.09 [-1.98; 4.17]	1.46 [1.34; 1.61]	0.31 [0.22; 0.4]	0.68	large	1	0.57 [-2.8; 3.94]	1.58 [1.49; 1.73]	0.35 [0.25; 0.43]	0.73	large	1
r-HVG	0.45 [-2.91; 3.81]	1.62 [1.51; 1.72]	0.31 [0.21; 0.4]	0.61	large	1	0.06 [-3.25; 3.36]	1.55 [1.46; 1.69]	0.32 [0.23; 0.41]	0.64	large	1
